# Supplementary material
Source: Springer Nature journal article supplement (https://www.springermedizin.de/resource/supplementary/12931_2007_611_MOESM1_ESM.pdf/9427224)
Supplement: MOESM1 [file 9427224]

| Glycan |                                                                                            | MAA1 | SNA | Viet04 |
|--------|--------------------------------------------------------------------------------------------|------|-----|--------|
| No     | Glycan name                                                                                |      |     |        |
| 24     | (Galβ1-4GlcNAcβ) <sub>2</sub> -3,6-GalNAcα-Sp8                                             | **   |     |        |
| 27     | [3OSO3][6OSO3]Galb1-4GlcNAcb-Sp0                                                           | *    |     |        |
| 28     | [3OSO3]Galb1-4Glcβ-Sp8                                                                     | **   |     |        |
| 29     | [3OSO3]Galβ1-4(6OSO3)Glcβ-Sp0                                                              | **   |     |        |
| 30     | [3OSO3]Galβ1-4(6OSO3)Glcβ-Sp8                                                              | **   |     |        |
| 32     | [3OSO3]Galβ1-3GalNAcα-Sp8                                                                  | **   |     |        |
| 33     | [3OSO3]Galβ1-3GlcNAcβ-Sp8                                                                  | **   |     |        |
| 35     | [3OSO3]Galb1-4[6OSO3]GlcNAcb-Sp8                                                           | **   |     |        |
| 36     | [3OSO3]Galβ1-4GlcNAcβ-Sp0                                                                  | **   |     |        |
| 37     | [3OSO3]Galb1-4GlcNAcb-Sp8                                                                  | **   |     |        |
| 38     | [3OSO3]Galβ-Sp8                                                                            | **   |     |        |
| 40     | [4OSO3]Galb1-4GlcNAcb-Sp8                                                                  |      |     | *      |
| 42     | [6OSO3]Galβ1-4Glcβ-Sp0                                                                     |      | *   |        |
| 43     | [6OSO3]Galβ1-4Glcβ-Sp8                                                                     |      | *   |        |
| 44     | [6OSO3]Galβ1-4GlcNAcβ-Sp8                                                                  | *    | *   |        |
| 45     | [6OSO3]Galb1-4[6OSO3]Glcβ-Sp8                                                              |      | *   |        |
| 49     | 9NAcSAa2-6Galb1-4GlcNAcb-Sp8                                                               |      | **  |        |
| 53     | SAa2-3Galb1-4GlcNAcb1-2Mana1-3(SAa2-3Galb1-4GlcNAcb1-2Mana1-6)Manb1-4GlcNAcb1-4GlcNAcb-Gly |      | **  |        |
| 54     | SAa2-3Galb1-4GlcNAcb1-2Mana1-3(SAa2-3Galb1-4GlcNAcb1-2Mana1-6)Manb1-4GlcNAcb1-4GlcNAcb-Sp8 |      | **  |        |
| 67     | Fuca1-2Galβ1-4(Fuca1-3)GlcNAcβ-Sp0                                                         | **   |     | *      |
| 132    | Galβ1-3GlcNAcβ1-3Galβ1-4Glcβ-Sp10                                                          | *    |     |        |
| 143    | Galb1-4GlcNAcb1-3(Galb1-4GlcNAcb1-6)GalNAca-Sp8                                            | **   |     |        |
| 144    | Galβ1-4GlcNAcβ1-3GalNAcα-Sp8                                                               | **   |     |        |
| 147    | Galβ1-4GlcNAcβ1-3Galβ1-4GlcNAcβ-Sp0                                                        | *    |     |        |
| 148    | Galβ1-4GlcNAcβ1-3Galβ1-4Glcβ-Sp0                                                           | *    |     |        |
| 149    | Galβ1-4GlcNAcβ1-3Galβ1-4Glcβ-Sp8                                                           | *    |     |        |
| 153    | Galβ1-4GlcNAcβ-Sp8                                                                         | *    |     |        |
| 188    | KDNα2-3Galβ1-4GlcNAcβ-Sp0                                                                  | **   |     |        |
| 202    | SAa2-3Galb1-3GalNAca-Sp8                                                                   |      |     | **     |
| 205    | SAa2-8SAa2-8SAα2-3Galβ1-4Glcβ-Sp0                                                          | **   |     |        |
| 212    | NeuAca2-3(NeuAca2-3Galb1-3GalNAcb1-4)Galb1-4Glcβ-Sp0                                       |      |     | **     |
| 213    | SAα2-3(SAα2-6)GalNAcα-Sp8                                                                  |      |     | *      |
| 214    | SAα2-3GalNAcα-Sp8                                                                          |      |     | *      |
| 215    | SAa2-3GalNAcb1-4GlcNAcb-Sp0                                                                |      |     | **     |
| 216    | SAα2-3Galβ1-3(6OSO3)GlcNAc-Sp8                                                             | *    |     | **     |
| 217    | SAα2-3Galb1-3(Fuca1-4)GlcNAcβ-Sp8                                                          |      |     | **     |
| 218    | NeuAca2-3Galb1-3(Fuca1-4)GlcNAcb1-3Galb1-4(Fuca1-3)GlcNAcb Sp0                             |      |     | **     |
| 219    | SAα2-3Galβ1-3(SAα2-3Galβ1-4)GlcNAcβ-Sp8                                                    |      |     | **     |
| 220    | Neu5Aca2-3Galb1-3[6OSO3]GalNAca-Sp8                                                        |      |     | **     |
| 221    | SAα2-3Galβ1-3(SAα2-6)GalNAcα-Sp8                                                           |      |     | **     |
| 222    | Neu5Aca2-3Galb-Sp8                                                                         |      |     | **     |
| 223    | NeuAca2-3Galb1-3GalNAcb1-3Gala1-4Galb1-4Glcβ-Sp0                                           |      |     | **     |
| 224    | NeuAca2-3Galb1-3GlcNAcb1-3Galb1-4GlcNAcb-Sp0                                               |      |     | **     |
| 225    | SAα2-3Galβ1-3GlcNAcβ-Sp0                                                                   |      |     | **     |
| 226    | SAα2-3Galβ1-3GlcNAcβ-Sp8                                                                   |      |     | **     |
| 227    | SAa2-3Galb1-4[6OSO3]GlcNAcb-Sp8                                                            | **   |     | **     |
| 228    | SAα2-3Galβ1-4(Fuca1-3)(6OSO3)GlcNAcβ-Sp8                                                   |      |     | **     |
| 229    | SAα2-3Galβ1-4(Fuca1-3)GlcNAcβ1-3Galβ1-4(Fuca1-3)GlcNAcβ1-3Galβ1-4(Fuca1-3)GlcNAcβ-Sp0      |      |     | **     |
| 230    | SAα2-3Galβ1-4(Fuca1-3)GlcNAcβ-Sp0                                                          |      |     | **     |
| 231    | SAα2-3Galβ1-4(Fuca1-3)GlcNAcβ-Sp8                                                          |      |     | **     |
| 232    | SAa2-3Galb1-4(Fuca1-3)GlcNAcb1-3Galb-Sp8                                                   |      |     | **     |
| 233    | SAa2-3Galb1-4(Fuca1-3)GlcNAcb1-3Galb1-4GlcNAcb-Sp8                                         |      |     | **     |
| 234    | SAa2-3Galb1-4GlcNAcb1-3Galb1-4(Fuca1-3)GlcNAc-Sp0                                          | *    |     |        |
| 235    | SAα2-3Galβ1-4GlcNAcβ1-3Galβ1-4GlcNAcβ1-3Galβ1-4GlcNAcβ-Sp0                                 | **   |     | **     |
| 236    | SAα2-3Galβ1-4GlcNAcβ-Sp0                                                                   | **   |     | **     |
| 237    | SAα2-3Galβ1-4GlcNAcβ-Sp8                                                                   | *    |     | **     |
| 238    | SAa2-3Galb1-4GlcNAcb1-3Galb1-4GlcNAcb-Sp0                                                  | *    |     | *      |
| 239    | SAα2-3Galβ1-4Glcβ-Sp0                                                                      | *    |     | **     |
| 240    | SAα2-3Galβ1-4Glcβ-Sp8                                                                      |      |     | **     |
| 242    | SAα2-6GalNAcα-Sp8                                                                          |      | *   |        |
| 243    | SAa2-6GalNAcb1-4GlcNAcb-Sp0                                                                |      | **  |        |
| 244    | SAa2-6Galb1-4[6OSO3]GlcNAcb-Sp8                                                            |      | **  |        |
| 245    | SAα2-6Galβ1-4GlcNAcβ-Sp0                                                                   |      | **  | *      |
| 246    | SAα2-6Galβ1-4GlcNAcβ-Sp8                                                                   |      | **  |        |
| 247    | SAa2-6Galb1-4GlcNAcb1-3Galb1-4(Fuca1-3)GlcNAcb1-3Galb1-4(Fuca1-3)GlcNAcb-Sp0               |      | **  |        |
| 248    | SAa2-6Galb1-4GlcNAcb1-3Galb1-4GlcNAcb-Sp0                                                  |      | **  |        |
| 249    | SAα2-6Galβ1-4Glcβ-Sp0                                                                      | *    | **  | **     |
| 250    | SAα2-6Galβ1-4Glcβ-Sp8                                                                      |      | **  |        |
| 251    | SAα2-6Galβ-Sp8                                                                             |      | **  |        |
| 261    | Neu5Gca2-3Galβ1-4Glcβ-Sp0                                                                  | **   |     |        |
| 262    | Neu5Gca2-6GalNAcα-Sp0                                                                      |      | *   |        |
| 263    | Neu5Gca2-6Galβ1-4GlcNAcβ-Sp0                                                               |      | **  |        |
